# Supplementary material for: The histone methyltransferase Setd2 is indispensable for V(D)J recombination
Source: PubMed Central journal article supplement (PMC6659703; doi:10.1038/s41467-019-11282-x), 2019-07-26
Supplement: 41467_2019_11282_MOESM1_ESM.pdf [file 41467_2019_11282_MOESM1_ESM.pdf]

## SUPPLEMENTARY INFORMATION

### **The histone methyltransferase Setd2 is indispensable for V(D)J recombination**

by Zhongzhong Ji *et.al*

|                                                                                                                                                                                           |    |
|-------------------------------------------------------------------------------------------------------------------------------------------------------------------------------------------|----|
| <b>Supplementary Figure 1</b>   Setd2-deficient competitive bone marrow transplant recipients exhibit impaired reconstitution of T cells and B cells in the BM and peripheral blood. .... | 2  |
| <b>Supplementary Figure 2</b>   H3K36me3 deposition was barely detected in Setd2 knockout thymocytes.....                                                                                 | 3  |
| <b>Supplementary Figure 3</b>   The rearrangement of TCR $\alpha$ was impaired in Setd2-deficient DP thymocytes.....                                                                      | 4  |
| <b>Supplementary Figure 4</b>   Expression of arranged TCRs abrogates the developmental block in Setd2-deficient thymocytes. ....                                                         | 5  |
| <b>Supplementary Figure 5</b>   Loss of Setd2 impairs V(D)J rearrangement at the Igh gene locus and blocks B cell development at the pro-B stage .....                                    | 6  |
| <b>Supplementary Figure 6</b>   Conditional knockout in B cells caused impaired B cell development and aberrant V(D)J recombination at Igh loci.....                                      | 7  |
| <b>Supplementary Figure 7</b>   Rag1 and H3K36me3 are enriched at Igh loci.....                                                                                                           | 8  |
| <b>Supplementary Figure 8</b>   The expression and deposition of H3K4me3 are not reduced by Setd2 knockout both in TCR $\beta$ and Igh genes loci.....                                    | 9  |
| <b>Supplementary Figure 9</b>   SETD2 is a recurrently mutated gene in human primary immunodeficiency patients. ....                                                                      | 10 |
| <b>Supplementary Figure 10</b>   Gating strategies used for flow cytometry data.....                                                                                                      | 11 |
| <b>Supplementary Table 1</b> : Complete Blood Count of Setd2 Knock out mice and control.                                                                                                  | 12 |
| <b>Supplementary Table 2</b> : Antibodies.....                                                                                                                                            | 13 |
| <b>Supplementary Table 3</b> : Primers for qRT-PCR, genotyping and Knock-out SETD2 .....                                                                                                  | 14 |
| <b>Supplementary Table 4</b> : Primers for ChIP assay .....                                                                                                                               | 15 |
| <b>Supplementary Table 5</b> : Primers for Rearrangement assay .....                                                                                                                      | 18 |
| <b>Supplementary Table 6</b> : Characteristics of Patients with SETD2 mutations .....                                                                                                     | 19 |

Supplementary Figure 1

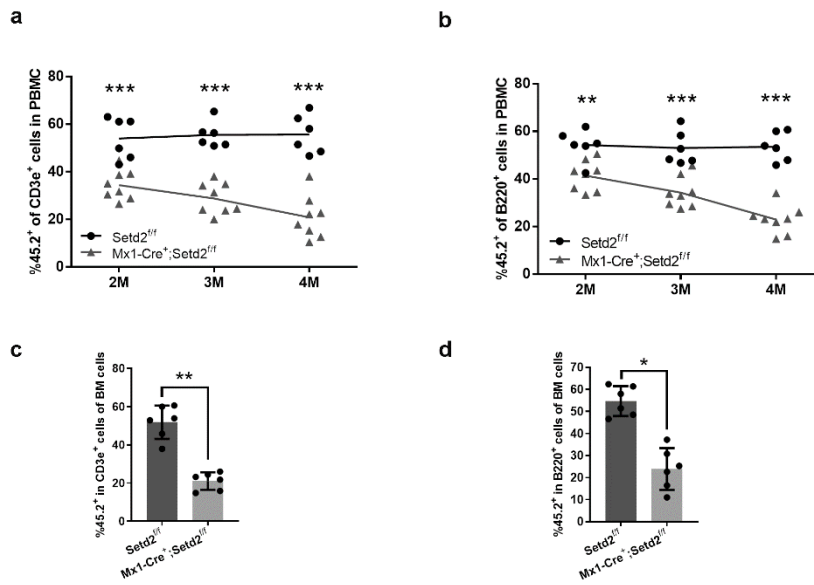

**Supplementary Figure 1 | Setd2-deficient competitive bone marrow transplant recipients exhibit impaired reconstitution of T cells and B cells in the BM and peripheral blood.**

(a-b) Chimerism of peripheral blood T and B cells in Setd2-deficient and wild-type bone marrow transplant recipients.

(c-d) Chimerism of bone marrow T and B cells in Setd2-deficient and wild-type bone marrow transplant recipients (n=14).

(The data are presented as the means  $\pm$  SDs. \* $p < 0.05$ ; \*\* $p < 0.01$ ; \*\*\* $p < 0.001$ )

Supplementary Figure 2

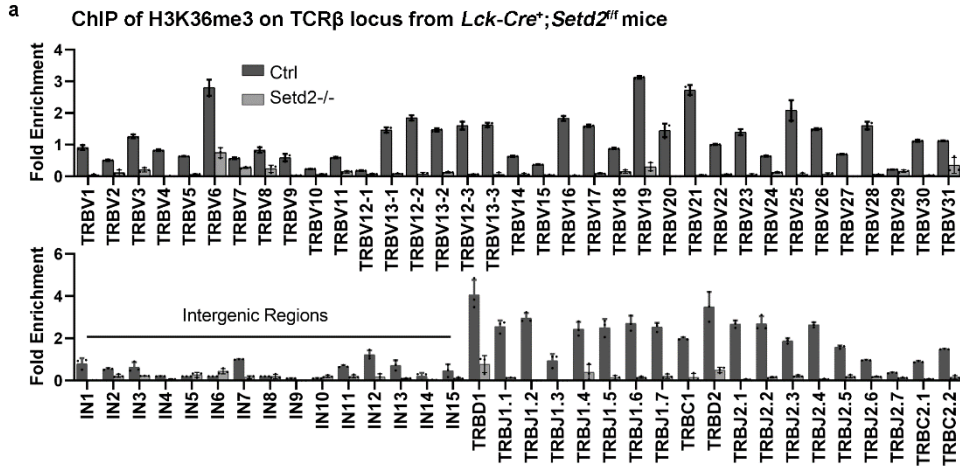

**Supplementary Figure 2 | H3K36me3 deposition was barely detected in *Setd2* knockout thymocytes.**

(a) ChIP assays of H3K36me3 at the TCR $\beta$  locus from *Lck-Cre<sup>+</sup>;Setd2<sup>fl/fl</sup>* mice with specific deletion of *Setd2* in thymocytes; the kidney from the same mice was used as the non-rearrangement control.

### Supplementary Figure 3

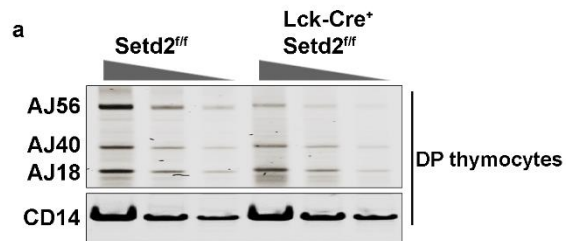

### Supplementary Figure 3 | The rearrangement of TCR $\alpha$ was impaired in Setd2-deficient DP thymocytes

(a) Semi-quantitative PCR analysis for TCR $\alpha$  rearrangement. The TCR $\alpha$  gene segments were designed for multiplex PCR. The forward primer from TRAV15 and reverse primer from TRAJ56, TRAJ40 and TRAJ18 were used, and CD14 was used as loading control (double positive DP, CD4<sup>+</sup>CD8<sup>+</sup>).

Supplementary Figure 4

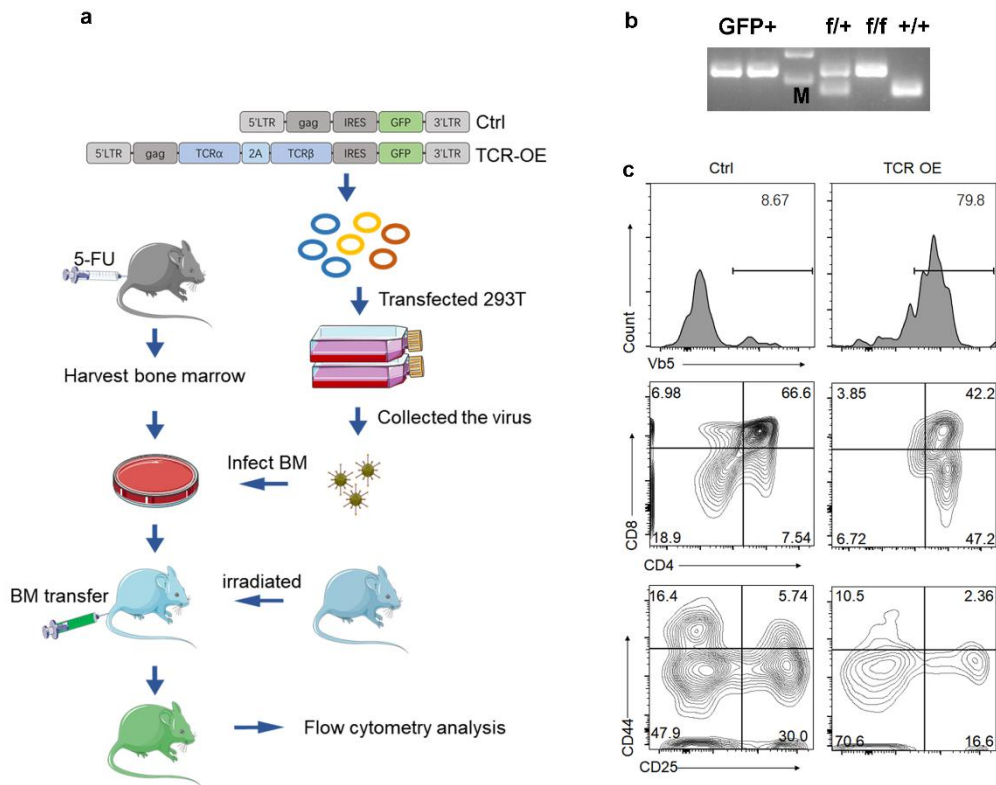

**Supplementary Figure 4 | Expression of arranged TCRs abrogates the developmental block in *Setd2*-deficient thymocytes.**

(a) Brief flow chart of the establishment of retrogenic mice for the expression of arranged TCRs in *Setd2* knockout thymocytes.

(b) Genotyping using genomic DNA from GFP<sup>+</sup> thymocytes from the recipients (retrogenic mice).

(c) Flow cytometric analysis of thymocytes from retrogenic mice transplanted with arranged TCR-expressing retrovirus or control virus.

Supplementary Figure 5

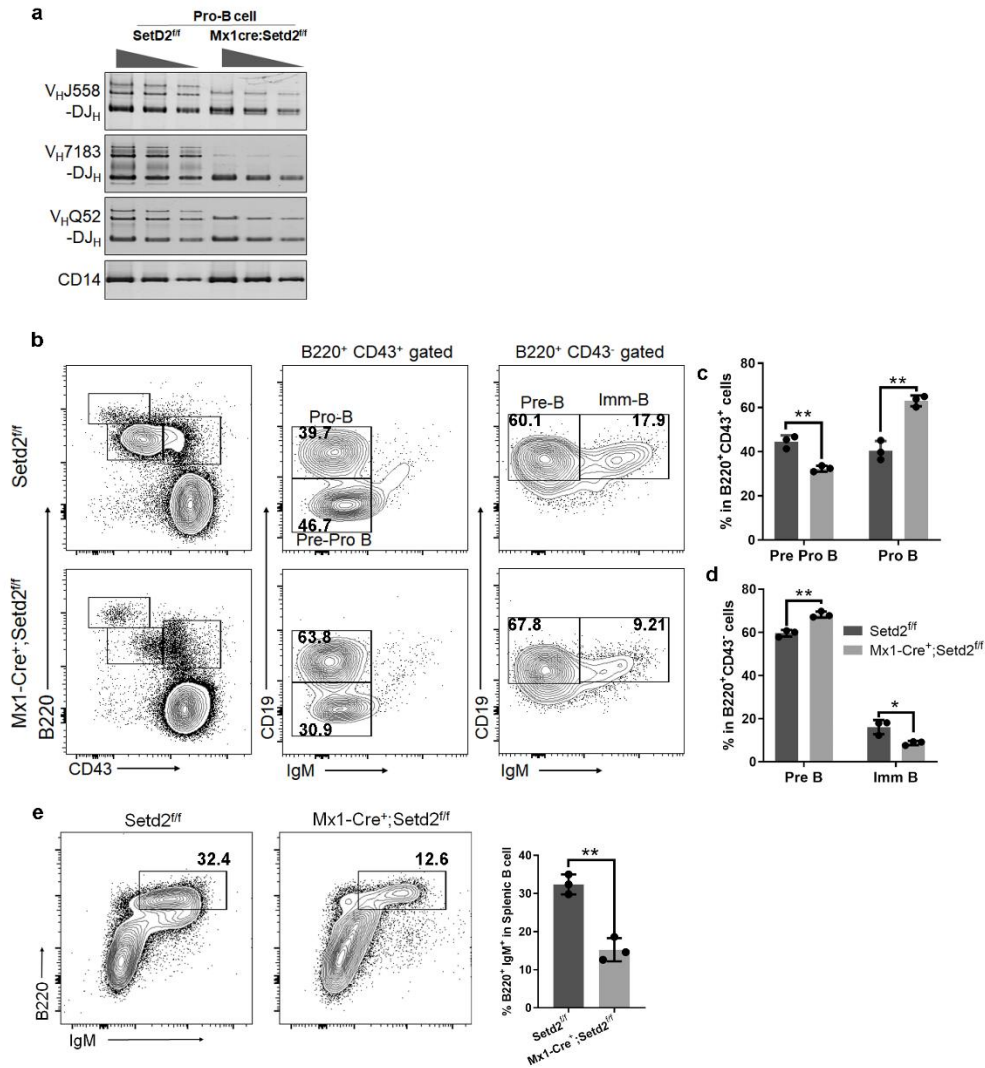

**Supplementary Figure 5 | Loss of Setd2 impairs V(D)J rearrangement at the Igh gene locus and blocks B cell development at the pro-B stage**

(a) Semi-quantitative PCR analysis of the indicated V<sub>H</sub>-to-DJ<sub>H</sub> rearrangements in sorted pro-B (B220<sup>+</sup>CD43<sup>+</sup>CD19<sup>+</sup>IgM<sup>-</sup>) cells from the bone marrow of Mx1-Cre<sup>+</sup>;Setd2<sup>fl/fl</sup> and control mice. V<sub>H</sub>J558-DJ<sub>H</sub> and V<sub>H</sub>Q52-DJ<sub>H</sub> represent distal rearrangements, while V<sub>H</sub>7183-DJ<sub>H</sub> represents a proximal rearrangement. (b-d) Representative flow cytometry plots of B cell developmental profiles in the bone marrow of Mx1-Cre<sup>+</sup>;Setd2<sup>fl/fl</sup> and control mice. Pre-pro-B (pre-pro B cells, B220<sup>mid</sup>CD43<sup>+</sup>CD19<sup>+</sup>IgM<sup>-</sup>), pro-B (pro-B cells, B220<sup>mid</sup>CD43<sup>+</sup>CD19<sup>+</sup>IgM<sup>-</sup>), pre-B (pre-B cells, B220<sup>mid</sup>CD43<sup>-</sup>CD19<sup>+</sup>IgM<sup>-</sup>), Imm-B (immature B cells, B220<sup>mid</sup>CD43<sup>-</sup>CD19<sup>+</sup>IgM<sup>+</sup>). (c-d) Histograms showing the frequencies of different subpopulations. (e) Flow cytometric analysis of splenic B cells in Mx1-Cre<sup>+</sup>;Setd2<sup>fl/fl</sup> mice and control mice. (Data were collected at 8 weeks after the final pIpC injection. The data shown are presented as the means ± SDs. n=6, \*\*p < 0.01, \*\*\*p < 0.001).

Supplementary Figure 6

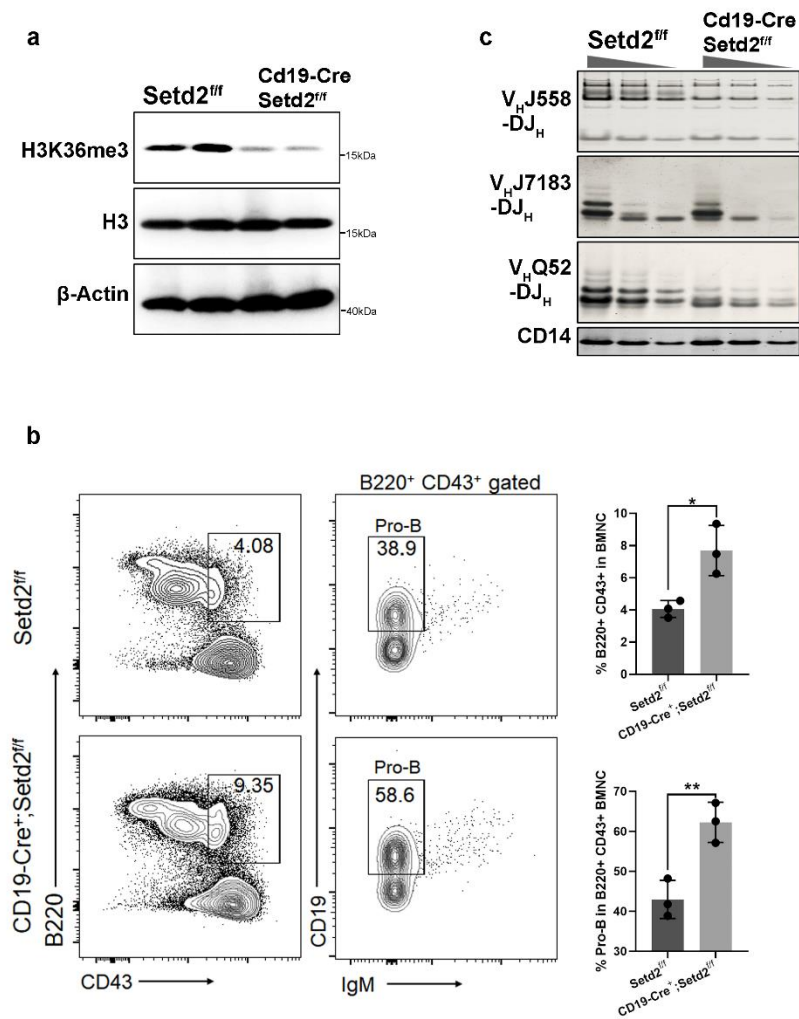

**Supplementary Figure 6 | Conditional knockout in B cells caused impaired B cell development and aberrant V(D)J recombination at Igh loci.**

(a) Immunoblotting of H3K36me3 in sorted B cells from Cd19-Cre<sup>+</sup>; *Setd2*<sup>fl/fl</sup> and control bone marrow. H3 and β-actin were used as loading controls.

(b) Representative flow cytometric plots of pro-B (B220midCD43+CD19+IgM-) cells from Cd19-Cre<sup>+</sup>; *Setd2*<sup>fl/fl</sup> and control bone marrow mononuclear cells (BMNCs). The histograms show the frequencies of the B220+CD43+ and pro-B cell subpopulations in BMNCs (n=6).

(c) V(D)J rearrangement assay for pro-B cells from Cd19-Cre<sup>+</sup>; *Setd2*<sup>fl/fl</sup> and control mice. DNA was diluted to 3 concentrations ranging from 150 to 30 ng and subjected to 32 amplification cycles for V<sub>H</sub>-to-D-J joint amplification or 24 cycles for CD14 amplification).

(The data are presented as the means ± SDs. \**p* < 0.05; \*\**p* < 0.01; \*\*\**p* < 0.001)

Supplementary Figure 7

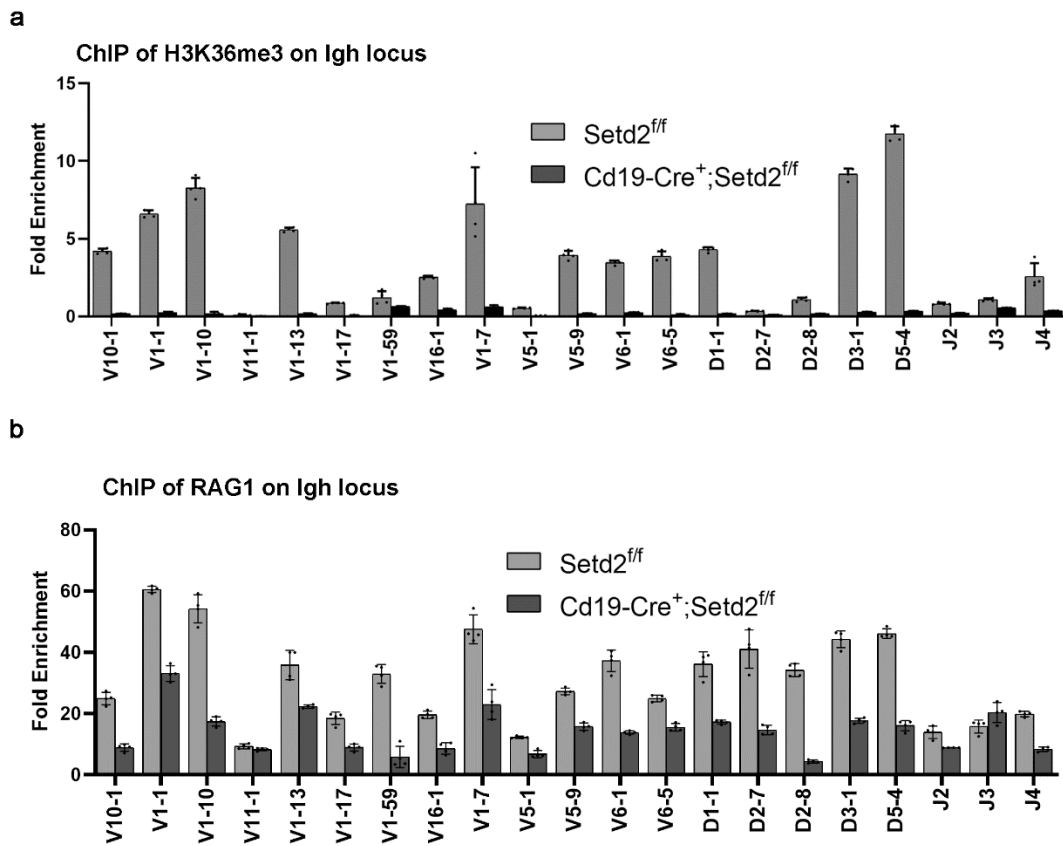

**Supplementary Figure 7 | Rag1 and H3K36me3 are enriched at Igh loci.**

**(a)** ChIP assay of H3K36me3 at selected segments of Igh loci in B220+CD19+ B cells from *Cd19-Cre<sup>+</sup>; Setd2<sup>f/f</sup>* mice and control mice.

**(b)** ChIP assay of Rag1 at selected segments of Igh loci in B220+CD19+ B cells from *Cd19-Cre<sup>+</sup>; Setd2<sup>f/f</sup>* mice and control mice.



Supplementary Figure 8

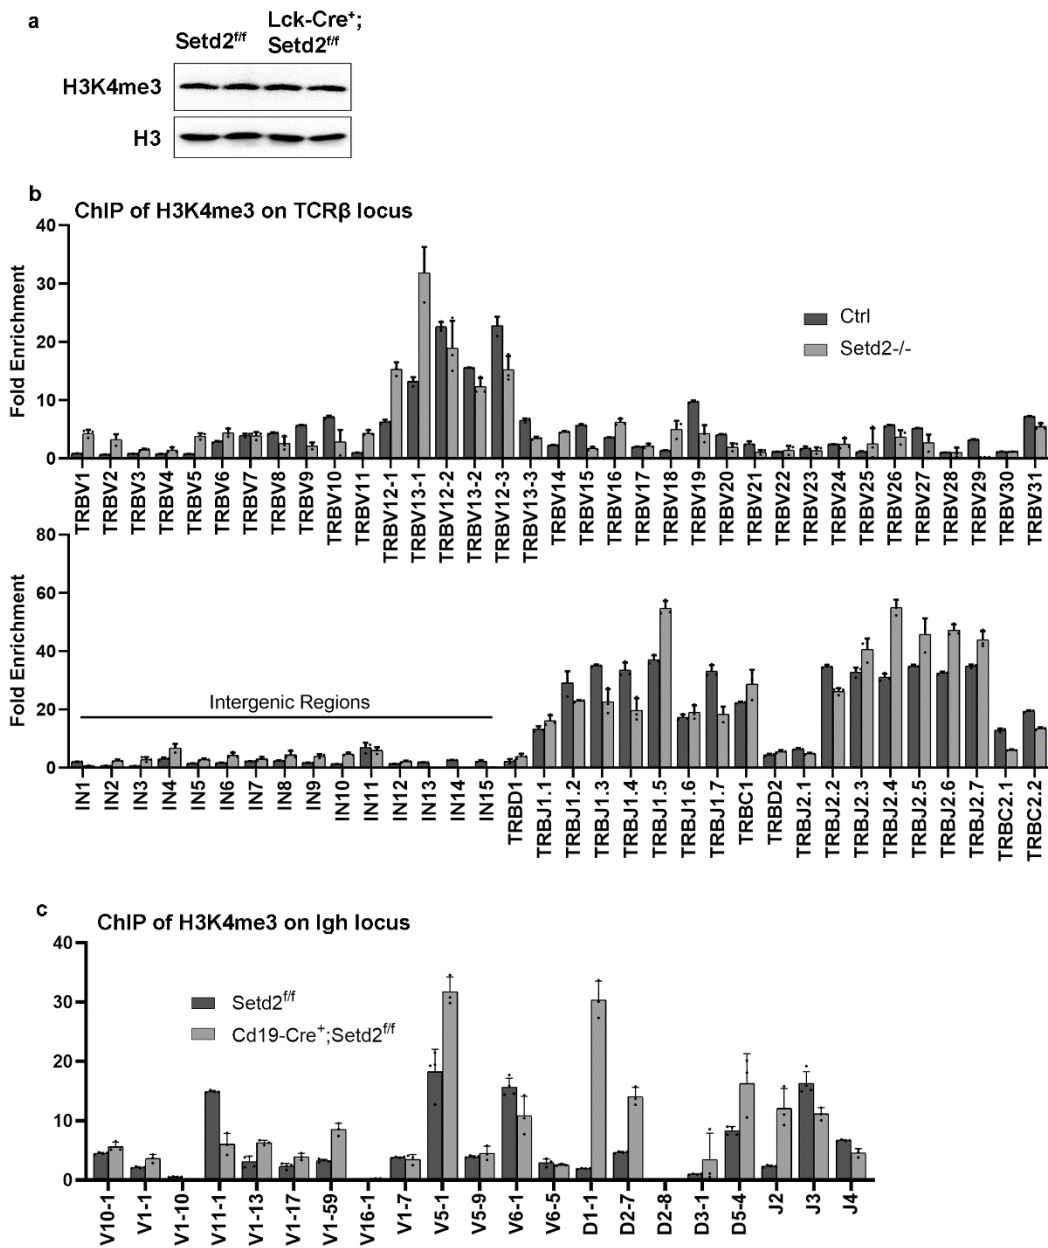

**Supplementary Figure 8 | The expression and deposition of H3K4me3 are not reduced by *Setd2* knockout both in TCRβ and Igh genes loci.**

(a) Immunoblotting of H3K4me3 in sorted (CD3<sup>+</sup>) T cells from *Setd2*-deficient mice. H3 was used as the loading control.

(b) ChIP assay of H3K4me3 at the TCRβ locus in DN thymocytes from Lck-Cre<sup>+</sup>; *Setd2*<sup>fl/fl</sup> mice and control mice.

(c) ChIP assay of H3K4me3 at the Igh locus of B220<sup>+</sup>CD19<sup>+</sup> B cells from Cd19-Cre<sup>+</sup>; *Setd2*<sup>fl/fl</sup> mice and control mice.

Supplementary Figure 9

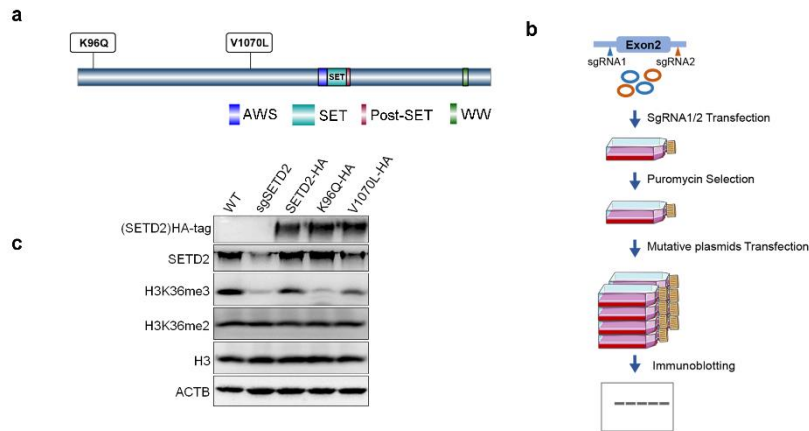

**Supplementary Figure 9 | *SETD2* is a recurrently mutated gene in human primary immunodeficiency patients.**

**(a)** Schematic diagram of *SETD2* mutations in human primary immunodeficiency patients.

**(b)** Procedure for the functional reconstitution assays of *SETD2* mutations in 293T cells.

**(c)** Immunoblotting of *SETD2* and H3K36me3 in 293T cells with CRISPR/Cas9-mediated *SETD2* knockout transfected with plasmids expressing wild-type or mutated *SETD2*.

Supplementary Figure 10

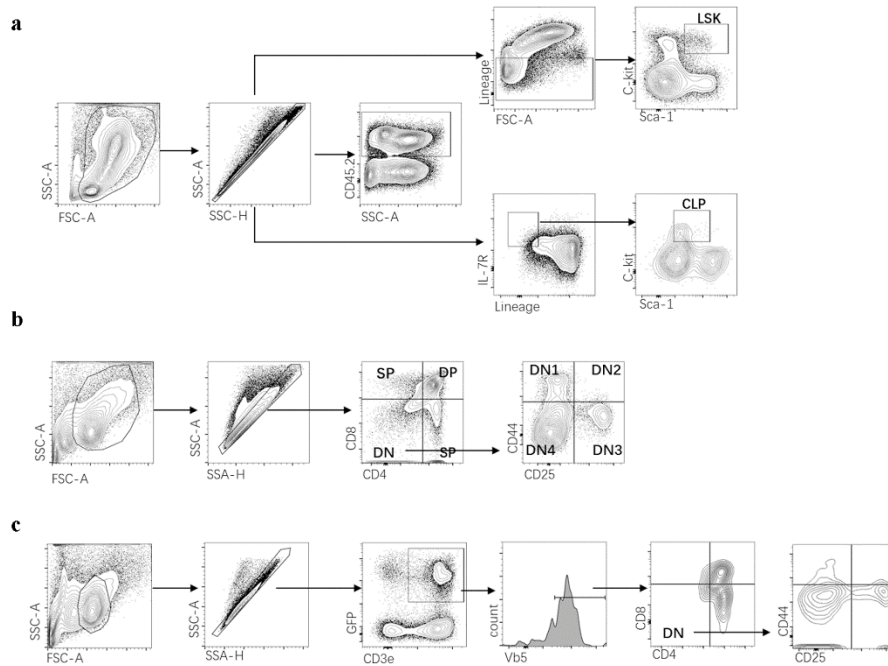

**Supplementary Figure 10 | Gating strategies used for flow cytometry data.**

**(a)** Gating strategy for identifying Hematopoietic stem cell enriched population (Lineage<sup>-</sup>c-kit<sup>+</sup> Sca-1<sup>+</sup>, LSK) and common lymphoid progenitors (Lineage<sup>-</sup> IL7R<sup>+</sup> Sca-1<sup>mid</sup> c-kit<sup>+</sup>, CLP). **(b)** Gating strategy for identifying single positive T cells (CD4<sup>-</sup>CD8<sup>+</sup> or CD4<sup>+</sup>CD8<sup>-</sup>, SP), double positive T cells (CD4<sup>+</sup>CD8<sup>+</sup>, DP), double negative T cells (CD4<sup>-</sup>CD8<sup>-</sup>, DN), DN1 (CD4<sup>-</sup>CD8<sup>-</sup> CD44<sup>+</sup>CD25<sup>-</sup>), DN2 (CD4<sup>-</sup>CD8<sup>-</sup> CD44<sup>+</sup>CD25<sup>+</sup>), DN3 (CD4<sup>-</sup>CD8<sup>-</sup> CD44<sup>-</sup>CD25<sup>+</sup>), DN4 (CD4<sup>-</sup>CD8<sup>-</sup> CD44<sup>-</sup>CD25<sup>-</sup>). **(c)** Gating strategy for analyzing the retrogenic TCR mice, TCR(Vb5) co-express with GFP.

**Supplementary Table 1: Complete Blood Count of Setd2 Knock out mice and control.**

|                           | <i>Setd2<sup>fl/fl</sup></i> | <i>Mx1-Cre<sup>+</sup>;Setd2<sup>fl/fl</sup></i> |     |
|---------------------------|------------------------------|--------------------------------------------------|-----|
| WBC(10 <sup>9</sup> /L)   | 5.580±0.482                  | 2.453±0.193                                      | *** |
| PBL(10 <sup>9</sup> /L)   | 3.833±0.298                  | 1.547±0.152                                      | *** |
| MO (10 <sup>9</sup> /L)   | 0.215±0.033                  | 0.156±0.037                                      | ns  |
| RBC (10 <sup>12</sup> /L) | 5.483±0.279                  | 4.898±0.321                                      | ns  |
| Hb (g/L)                  | 142.429±5.355                | 129.250±7.974                                    | ns  |
| HCT (%)                   | 21.860±0.224                 | 19.733±2.532                                     | ns  |
| MCV (fl)                  | 39.267±2.937                 | 38.918±2.172                                     | ns  |
| MCH (pg)                  | 24.980±0.315                 | 27.325±1.087                                     | **  |
| MCHC (g/L)                | 669.333±45.829               | 681.000±26.184                                   | ns  |
| RDW (%)                   | 44.275±5.421                 | 34.317±3.230                                     | **  |
| PLT (10 <sup>9</sup> /L)  | 374.750±38.491               | 478.462±35.674                                   | **  |
| MPV (fl)                  | 5.100±0.141                  | 4.229±0.243                                      | *** |

Complete blood count of the peripheral blood of *Mx1-Cre<sup>+</sup>;Setd2<sup>fl/fl</sup>* and control mice after 8 weeks treated with three doses of PIPC. (The data are presented as the means ± SDs. \* $p < 0.05$ ; \*\* $p < 0.01$ ; \*\*\* $p < 0.001$ ; ns, not significant)

## Supplementary Table 2: Antibodies

Antibodies used for flow cytometry

| ID                  | Clone or Catalog No. | Vol./10 <sup>6</sup> cells | Brand                      |
|---------------------|----------------------|----------------------------|----------------------------|
| Mouse Lineage Panel | Biotin label         | 4 µL                       | BD <sup>®</sup> Bioscience |
| Sca-1               | D7                   | 1.5 µL                     | eBioscience <sup>™</sup>   |
| C-Kit               | 2B8                  | 1.5 µL                     | eBioscience <sup>™</sup>   |
| CD3e                | 145-2C11             | 3 µL                       | BD <sup>®</sup> Bioscience |
| CD4                 | RM4-5                | 3 µL                       | BD <sup>®</sup> Bioscience |
| CD8                 | 53-6.7               | 3 µL                       | eBioscience <sup>™</sup>   |
| CD44                | IM7                  | 2 µL                       | eBioscience <sup>™</sup>   |
| CD25                | PC61.5               | 2 µL                       | eBioscience <sup>™</sup>   |
| CD45.2              | 104                  | 3 µL                       | eBioscience <sup>™</sup>   |
| B220                | RA3-6B2              | 3 µL                       | eBioscience <sup>™</sup>   |
| CD19                | 1D3                  | 3 µL                       | BD <sup>®</sup> Bioscience |
| IgM                 | II/41                | 2 µL                       | eBioscience <sup>™</sup>   |
| IL-7R               | SB/199               | 1.5 µL                     | eBioscience <sup>™</sup>   |
| FcγR                | 93                   | 1.5 µL                     | eBioscience <sup>™</sup>   |
| TCR-Vb5.1           | MR9-4                | 3 µL                       | Biologend                  |
| Streptavidin        | V450-Streptavidin    | 5 µL                       | BD <sup>®</sup> Bioscience |

Antibodies used for IHC and western blotting

| ID              | Clone or Catalog No. | Dilution | Brand                     |
|-----------------|----------------------|----------|---------------------------|
| SETD2           | #23486               | 1:1000   | Cell Signaling Technology |
| SETD2           | #3194                | 1:1000   | Abclonal                  |
| HA-tag          | #3724s               | 1:1000   | Cell Signaling Technology |
| H3K36me3        | ab9050               | 1:1000   | Abcam                     |
| H3K36me2        | ab3594               | 1:1000   | Abcam                     |
| H3K4me3         | #9751                | 1:1000   | Cell Signaling Technology |
| H3              | ab1791               | 1:3000   | Abcam                     |
| RAG1            | #3968s               | 1:500    | Cell Signaling Technology |
| RAG2            | ab133609             | 1:500    | Abcam                     |
| γH2A.X (p-S139) | ab26350              | 1:500    | Abcam                     |
| ATM             | ab78                 | 1:500    | Abcam                     |
| ATM (p-S1981)   | ab81292              | 1:500    | Abcam                     |
| β-Actin         | #3700                | 1:3000   | Cell Signaling Technology |

**Supplementary Table 3: Primers for qRT-PCR, genotyping and Knock-out SETD2**

Primers for Real-time PCR

| ID       | Sense 5'-3'               | Antisense 5'-3'           |
|----------|---------------------------|---------------------------|
| mSetd2   | CATAGCTGTGAACCAAAGTGTGA   | TAATTCTGAGCCTGAAGGAACTA   |
| mRag1    | GGCTAGGGTCAGCAGCAAGGA     | CACGGGATCAGCCAGAATGTGTCC  |
| mRag2    | CAGAACTTCAGGATGGGCTGTCTTT | TTTGAGTGAGGATTGCACTGGACAC |
| mNHEJ1   | TCTGGAGAGACTCAGGCATCAA    | AGCAGCCACAGGCTCATATTCA    |
| mKu70    | GGTGCCCCAGGAAGAGGA        | TGTATGTGAAGCGGAGCTTTTG    |
| mKu80    | CAGCGCTTCAACAGCTTCTT      | TCCACATCACCAGCTTCTTCA     |
| mXrcc4   | ATGATGGAAGCACCGATGAA      | CTTCTCCTGTAGCGGCAACTC     |
| mLig4    | TGAGCTGCGGTTTCATGG        | CTGCAGTTCGCCCTTGTCTA      |
| mDna-pk  | CCCGCCAATTTGTCAGTCT       | TCCTCCTTTTCTCAGCATTGTC    |
| mTAOK    | ACAACAACCTAAGAGTCTGAAGTCT | TGGTGTAGTCTCCAGTAGGTGA    |
| mDCLRE1C | CTGCACTCTGGAGGCAGAGT      | CACTGCTCACGACTTGGGATCT    |
| mMDC1    | CAGCACCCAGAAGCTGTCCA      | CACCTGGAGTCTGAAGGCTGA     |
| mCHEK2   | CCGGACTTACAGCAAGAAGCA     | CTGTGATCCTCTATGTATACGATGT |
| mPRKDC   | AATTGCATTAGTGCTGTGGTGCA   | GGTTATCAGACCTAGACTCAACAT  |
| mActin   | GTGGCATCCATGAAACTACA      | CTCATCGTACTCCTGCTTGC      |

Primers for genotyping

| ID       | Sense 5'-3'             | Antisense 5'-3'          |
|----------|-------------------------|--------------------------|
| Setd2    | TGCTGAGGAAACACCATCCC    | GATCTCTGAAGGCAGCAGCA     |
| Mx1-Cre  | TTTCGTTTCTGAGCTCCTTTC   | ATTGCCCTGTTTCACTATC      |
| Lck-Cre  | TTACCGGTCGATGCAACGAGTGA | AGCTGGCCCAAATGTTGCTGGATA |
| Cd19-cre | GCGGTCTGGCAGTAAAACTATC  | GTGAAACAGCATTGCTGTCACTT  |

Primers for knock out SETD2

| ID        | Sense 5'-3'               | Antisense 5'-3'           |
|-----------|---------------------------|---------------------------|
| sgSETD2-1 | caccgATGGTAACTTATCCCAGTGA | aaacTCACTGGGATAAGTTACCATC |
| sgSETD2-2 | caccgAGAAATCAGTCGGCAGGACA | aaacTGTCTGCGGACTGATTTCTC  |

**Supplementary Table 4: Primers for ChIP<sup>1</sup> (TCR $\beta$  loci)**

| Primer ID | Sense 5'-3'                | Antisense 5'-3'           |
|-----------|----------------------------|---------------------------|
| TRBV1     | CCACAGTGACTTTGCTGGAGC      | CTCCGCAGAGTGAACAGCCACTGT  |
| TRBV2     | TGGTGGCAGGTGAGTCCTAGT      | TCCCTGTGACTGCCACCAGAT     |
| TRBV3     | ATGGATATCTGGCTTCTAGGTTGGAT | ATTTGATGACTTGGGATCTGTAAGA |
| TRBV4     | TGGCCTTCTGCCTCTTGGGAAT     | CTGTGTGACATGATAGTTTGGAGT  |
| TRBV5     | CAGGTGAGACTTGGATTCCACA     | CCCAGGATTAGATATCTTGGTGA   |
| TRBV6     | CCAGAGGAAATATGGAATCTGGA    | AGAATGAAGCCAGAACTCCACA    |
| TRBV7     | GTCTCCTGGGAGCAGATGAATCA    | GGTTTCAGGTTACATGACTCTGGAA |
| TRBV8     | TGCAGGCAGGTGAATTCTGTGCA    | GAATGATACCAGCACTCACTGGA   |
| TRBV9     | GACCTCACTAGTGCTGAATTCT     | GCCTCATCTTGAGTTCTGTCAGTA  |
| TRBV10    | TGGAATCACCCAGACACCTAGA     | CAGTGCCTACTGAGTAATGGATCA  |
| TRBV11    | CTTCTGATATGTGGCCTCTCACTT   | GGTGATCCTATGAGTAGGAGACT   |
| TRBV12-1  | GTCTAACACTGTCCTCGCTGA      | GGACAACCCCAGAATCTGCTGAA   |
| TRBV13-1F | GAGCCTCCTGTGTACAAGTGA      | CTAGGGCTTTGGGTGACTGCA     |
| TRBV12-2  | CCTGGGAACAAGTAAGTCCAGA     | TGGAGACTGGACAACCCCAGAA    |
| TRBV13-2  | CCAGTCTCCTGTGTTCAAGTGA     | GGTGACTGCAGCCTCCATGT      |
| TRBV12-3  | CCTGGGAACAAGTGTGTCCTGA     | GGACAACCCCAGAATTTGCTGA    |
| TRBV13-3  | TTGATTCTCCTGTGTGCAAGTGA    | GACTTTGGGTGACTGCAGCCT     |
| TRBV14    | TCCTCTGCCCTCAATCTGCCA      | GTGACTCCAGCTTCAGACAGTA    |
| TRBV15    | TCCAGACCCTCTGTTGTGTGAT     | GGTGTCTGGGTAACCTCCAGCA    |
| TRBV16    | AAGCCACTGCCTCATCTTGCCA     | TGACACCAGCATTGTGTTGGTTCTA |
| TRBV17    | TGGACCATCCATGGATCCTAGA     | GTTCTGCTTAACCGTAGTATCCA   |
| TRBV18    | ATGTCTCAGGAATGCTGGTGTCA    | CAGCATTCTGGCCTCTCTAA      |
| TRBV19    | GTAACCCCTTGTCTCCTTACTGTA   | GCCACCATCACCATGTGTGGT     |
| TRBV20    | GTGGTGTGAAGTCAACACTGAAGA   | CAAGGTATAGCATGGCTCATACCA  |
| TRBV21    | TCAGCACTCTCTATGAATCAACCA   | CCAGAGTCCATGGAGCCTGT      |
| TRBV22    | TATCTCCTAGTAGCAGGTGAGTC    | TTGGCAATCCAAGAGCCTAGAA    |
| TRBV23    | CGGCTCATTGCTATGTAGCAC      | GCTTCTGTGTAACCTGCAGCATC   |
| TRBV24    | CTAGTGTGATCATGGGTGCAAGA    | TGGAGTCTGGGTTACTCCAGCAA   |
| TRBV25    | CTTGATACAAAGTGTGAGAACCCTCA | CTGAGGACTCATCTGCTCCAGT    |
| TRBV26    | TGTCTCCTGGGTGCAAGTAAGT     | GTTGGCAATCTCCAGGTCAAAGA   |
| TRBV27    | TAATCTGGGAGCAGGTAAGATGCA   | GATAATAGCATCCAATAGGCCTGCA |
| TRBV28    | CTATGAACAGGTGAGTTCTGAAACA  | GGGCTTCTGTGGAGACTACGA     |
| TRBV29    | CTGTGTTTCTAGGAACAGGTGA     | TGTCCACAAGGCCTGTGGTGAA    |
| TRBV30    | AGGAGCCTTGTCTGAGCTGA       | TGTCTCCCTCATCCTCTAACTAGT  |
| TRBV31    | GAGACTCCAGGCACAGAGGTA      | GTGGTGCAACTGAACCTCTCA     |
| TRBD1     | GTTTCTTCCAGCCCTCAA         | CCCATTCTTCTCCACAA         |
| TRBJ1.1   | CTCCTCATCCTATGGCACTGT      | ATCTTACCTACAACCTGTGAGTCT  |
| TRBJ1.2   | TGCAAACTCCGACTACACCTTC     | ATGAGCAGCATCCTCCTCTGA     |
| TRBJ1.3   | CTGTGTTCTGGAAATACGCTCTA    | TCAGAGAGAACTTCACCCAGTA    |
| TRBJ1.4   | CGGTCATGGAACCAAGCTGTCT     | CGTGGCTCTAGGTTTACAACACA   |
| TRBJ1.5   | CTCATGTTGTAAGTGTGTAACAACCA | CAGTTTGGTCCCATAGTTTACCTA  |

|         |                           |                           |
|---------|---------------------------|---------------------------|
| TRBJ1.6 | CCACCTGCAGCTGTGTTTCCTA    | CTCACTGTGACAGGTATGGG      |
| TRBJ1.7 | CCTGTGTTGGATGACCATGGT     | AGGGACGACTCTGTCTTACCTTA   |
| TRBC1   | AGGATCTGAGAAATGTGACTCCA   | GACCTCCTTGCCATTAC         |
| TRBD2   | CCAAGCTCCTCCCCTCTTTAGA    | AGCACCTCTTCCAGTTGAATCATT  |
| TRBJ2.1 | CTGCTGTGTAACATGCTGAGCA    | TATGGCCTCTGCCTTCTTACCTA   |
| TRBJ2.2 | AGCATTTCCAGGACTGTGCAAACA  | CACTGTCAGCTTTGAGCCTTCA    |
| TRBJ2.3 | GCCTGGAGGCTGTGAGTGCA      | CCAACTTACCGAGAACAGTCAGT   |
| TRBJ2.4 | TGTACCAAGAGGCTGTGAGTCA    | CAGCTTACCTAGCACCGATAGT    |
| TRBJ2.5 | CTGTGAACCAAGACACCCAGTA    | CCTAACACGAGGAGCCGAGT      |
| TRBJ2.6 | ACTGATTGGCAGCCGATTGAACA   | GCAGTTGCCAAGAAGCTCGCA     |
| TRBJ2.7 | CCTCTGTGCTCCTATGAACAGTA   | TGGAAGCGAGAGATGTGAATCTTA  |
| TRBC2.1 | CCAGAGGATCTGAGAAATGTGAC   | AGCTCAGCTCCACGTGGTCA      |
| TRBC2.2 | CCTGTCAACAGCATCCTATCATCA  | GTCCATCCTACCATTCTTACCAT   |
| IN1     | TGCCTGCTCCATCTGGAGCA      | TAGGAAGAAGGAAGGACTGGAC    |
| IN2     | GACTAGGCCATCCTCTGCTACA    | GACTTGCTAAGTGTGAACTATGACA |
| IN3     | CTTTAAGTCTGATGCTGCACTC    | AGGCGTGGACATTAACACATCTAC  |
| IN4     | CAGAACTCCAAATAGACTGGACCA  | CTGGCTTTCATAGTCTCTGGTGA   |
| IN5     | AGCACGTAAGGAAGCACAGAAGA   | GTGGGAGGGCAGATTGTGAGA     |
| IN6     | CTTCAGAGGCTCTTAGAACATTGA  | TCTGAAGAACTCATTGAGTCCTGA  |
| IN7     | GACCATGGAGTGGCACCATC      | GAAGACTGACTTCGAGGGCAACTA  |
| IN8     | GCAGACAGTACCCACTGGTCA     | GGTGCTATACTTGTGAGGAGCA    |
| IN9     | GTGATATTGAATGTAAGTCACAGGA | CCCATGGTATTTCATACTCTATCA  |
| IN10    | CAGCTAGCTTCAGAGATTACCAGA  | CTCTTTAGCAGTGCTCTCCTGT    |
| IN11    | AGCAAGCCGCACCTCTGGTA      | CGACAAACCCTGAGCCAGTC      |
| IN12    | TACCTGGTGTTCGAACCAGACT    | TGGAACTTGAGACTGCGGTAC     |
| IN13    | AAAGGATGGACCATCCAGAGACT   | CCAGGCAGTGGCATAACCTCA     |
| IN14    | TCCACTCCTGATGTCCACATTC    | GACAAACATGGTATGTACTCACTT  |
| IN15    | TCATCCACTGAATCACCAAGTAC   | GTCTGAGAGATCTTAGGAGTCCA   |

**Primers for ChIP (Igh loci)**

| Primer ID | Sense 5'-3'                | Antisense 5'-3'           |
|-----------|----------------------------|---------------------------|
| V10-1     | GTCTGCATCTTCATCTGAGCTGA    | ATCTTCAGTGTGAGCCTAGACA    |
| V1-1      | ACGTCACAGTGAGGATGTGACA     | CTAGGCACATATCCTCCAGCAT    |
| V1-10     | CTACTCCATGAGAGTTTCTGACA    | CTGACATCTGAAAACCTCTGCAGTC |
| V1-13     | TTCTGACACTCTCAGGATGTGG     | CCAACACAGCCTACATGCAACT    |
| V1-17     | TAAGTCTTGTGAGTCTCAAGGCA    | CAAGACACAGTGTGTAACCACA    |
| V1-59     | CATACTACACACCATCCTGGCT     | AACCCTGGAGGAGTAGCAAACCT   |
| V16-1     | TGCTGGTCCTGAGCTCCTTGT      | TCTGAGAAACGAAGACACGGCT    |
| V1-7      | TCATCAAGCCTACAGGTTAGTC     | AGACACAGTGGTGAACCAT       |
| V5-1      | TTTGTGTTTGTGAGCTCACAGTAACA | CCGATTACCATCTCCAGAGA      |
| V6-1      | CTTCTACACAAGCCATGGGTA      | GCAACATGTTATGGAGGTTTGT    |
| V6-5      | GTATCAATAGATAGTGGTGTACC    | TGTAGGTGTTCTGAGGTCCACTA   |
| D1-1      | CTAGACTCAGTTTTTGGAGCTCAA   | CTACGGTAGTAGCTACCACAGT    |
| D2-7      | GCTGAAGAGTCTGCTGGGCATA     | AGAACGTGTTACCTTACTTGGCA   |



|      |                         |                          |
|------|-------------------------|--------------------------|
| D2-8 | CTGTGGTAGTTACCATAGTAGAC | CTCTGGCCCCACCAGACAAT     |
| D3-1 | AAAGCCAGAAAGGGAATAGGTCT | CTGTCACAGTGGGCACAGCT     |
| D5-4 | CTGACTGGCTAAACACTGTAGA  | CACAAGAGGTGGATTCTGTATGT  |
| J2   | GAGGTTGTAAGGACTCACCTGA  | ACATTGTTAGGCTACATGGGTAGA |
| J3   | CTGCAGAGACAGTGACCAGAGT  | TGGAGCCCTAGCCAAGGATCA    |
| J4   | CATTCTTACCTGAGGAGACGGT  | GTGTGACACCAGGAATTGGCAT   |

**Supplementary Table 5: Primers for Rearrangement assay <sup>2</sup>**

| <b>ID</b>           | <b>5'-3'</b>                        |
|---------------------|-------------------------------------|
| TRBV3               | GATTTTAGGACAGCAGATGGAGTTTC          |
| TRBV12-2            | CAGCAGATTCTCAGTCCAACAGTTT           |
| TRBV30              | CCGGCCAAACCTAACATTCTCAAC            |
| TRBD1               | GAGGAGCAGCTTATCTGGTGGTTT            |
| TRBD2               | GTAGGCACCTGTGGGGAAGAACT             |
| TRBJ1.7             | AAGGGACGACTCTGTCTT                  |
| TRBJ2.7             | TGAGAGCTGTCTCCTACTATCGATT           |
| J <sub>H</sub> 3R   | GTCTAGATTCTCACAAGAGTCCGATAGACCCTGG  |
| V <sub>H</sub> J558 | CGAGCTCTCCARCACAGCCTWCATGCARCTCARC  |
| V <sub>H</sub> 7183 | CGGTACCAAGAASAMCCTGTWCCTGCAAATGASC  |
| V <sub>H</sub> Q52  | CGGTACCAGACTGARCATCASCAAGGACAAAYTCC |
| TRAV15              | TCCATCAGCCTTGTCATTCA                |
| TRAJ56              | TGGTATAAACAACCTCAGAACGGT            |
| TRAJ40              | TGGTACCTGCTCCAAAGACG                |
| TRAJ18              | CTGAACCTCTATCTACACAGTG              |
| CD14-F              | GCTCAAACCTTCA GAATCTAC              |
| CD14-R              | AGTCAGTTCGTGGA GGCCGGAAATC          |

**Supplementary Table 6: Characteristics of Patients with *SETD2* mutations**

| Characteristic          | Patient 1        | Patient 2      | Patient 3                          | Patient 4                                                                       | Patient 5                               | Patient 6                                             | Patient 7                                                        | Patient 8                           |
|-------------------------|------------------|----------------|------------------------------------|---------------------------------------------------------------------------------|-----------------------------------------|-------------------------------------------------------|------------------------------------------------------------------|-------------------------------------|
| Age                     | 1 months         | 12 months      | 10 months                          | 7 months                                                                        | 2 months                                | 4 years                                               | 3 years                                                          | 3 months                            |
| Sex                     | Male             | Male           | Female                             | Male                                                                            | Female                                  | Male                                                  | Male                                                             | Male                                |
| SETD2 mutation          | V1070L           | H1026Y         | S1792N                             | K96Q                                                                            | N1943S                                  | H216D                                                 | A1382S                                                           | K308E                               |
| Clinical manifestations | Severe infection | Recurrent rash | Recurrent fever,<br>High lever CRP | Skin infection<br>with<br>Streptococcus<br>pneumoniae, liver<br>function damage | Tongue ulcer,<br>pulmonary<br>infection | recurrent<br>acidocytosis,<br>pulmonary<br>infection, | Recurrent<br>infection,<br>hyperacidophilia,<br>lymphadenectasis | Infection<br>resulting in<br>sepsis |
| IgG (g/L)               | 3.04             | ND             | 6.6                                | 2                                                                               | 3.87                                    | 9.4                                                   | 12.7                                                             | 5.53                                |
| IgA (g/L)               | 0.08             | ND             | 0.26                               | 0.28                                                                            | 0.09                                    | 1.98                                                  | 0.97                                                             | 0.28                                |
| IgM (g/L)               | 0.3              | ND             | 1.24                               | 0.32                                                                            | 0.63                                    | 0.74                                                  | 2.2 1                                                            | 0.29                                |
| IgE (KU/L)              | 185              | ND             | 24                                 | 2530                                                                            | 11                                      | 55789                                                 | 193                                                              | 10                                  |
| CD3+T (/ul)             | 10               | ND             | ND                                 | 9161                                                                            | 2729                                    | 2233                                                  | 3679                                                             | 997                                 |
| CD4+T (/ul)             | 4                | ND             | ND                                 | 7120                                                                            | 2200                                    | 1376                                                  | 1924                                                             | 739                                 |
| CD8+T (/ul)             | 4                | ND             | ND                                 | 1785                                                                            | 450                                     | 664                                                   | 1459                                                             | 220                                 |
| CD19+B (/ul)            | 847              | ND             | ND                                 | 1259                                                                            | 1057                                    | 618                                                   | 1203                                                             | 1100                                |
| CD16/56+NK (/ul)        | 42               | ND             | ND                                 | 1528                                                                            | 246                                     | 232                                                   | 490                                                              | 311                                 |

ND : No Data

## Supplementary Reference

1. Rupp, L. J., Chen, L., Krangel, M. S. & Bassing, C. H. Molecular Analysis of Mouse T Cell Receptor  $\alpha$  and  $\beta$  Gene rearrangement. **1323**, (2016).
2. Gärtner, F. *et al.* Immature thymocytes employ distinct signaling pathways for allelic exclusion versus differentiation and expansion. *Immunity* **10**, 537–546 (1999).
